# Supplementary material for: Manipulation of the human tRNA pool reveals distinct tRNA sets that act in cellular proliferation or cell cycle arrest
Source: eLife. 2020 Dec 24;9:e58461. doi: 10.7554/eLife.58461 (PMC7781600; doi:10.7554/eLife.58461)
Supplement: Figure 1—source data 1. [file elife-58461-fig1-data1.xlsx]

## Sheet: Sheet1
sgRNA name	sgRNA sequence
ArgACG-sgRNA	GATTCCAGGTTCGACTCC
ProAGG-sgRNA	GGGTATGATTCTCGCTTA
LeuCAG-sgRNA	GTCTAAGGCGCTGCGTTC
TrpCCA-sgRNA	GCGTGTTCAAATCACGTC
GlyCCC-sgRNA	GAACCCGGGTCGCAAGAA
ArgCCG-sgRNA	GGATAAGGCGTCTGATTC
SerCGA-sgRNA	GTTGGACTCGAAATCCAA
ProCGG-sgRNA	GGGTATGATTCTCGCTTC
ThrCGT-sgRNA	GACCGACGCCTTACCACT
GlyGCC-sgRNA	GGGCCGGGAATCGAACCC
IleAAT-sgRNA	GTGGTGCTAATAACGCCA
AsnATT-sgRNA	GCAATCGGTCAGAGCGTT
LeuCAA-sgRNA	GGATGGCCGAGTGGTCTA
ValTAC-sgRNA	GTCTGCTTTACACGCAGA
LeuTAG-sgRNA	GTCTAAGGCGCTGGATTT
IleTAT-sgRNA	GTGAGTTCGAGCCTCACC
ArgTCG-sgRNA	GGATAAGGCGTCTGACTT
ArgTCT-sgRNA	GCGCAATGGATAGCGCAT
GluTTC-sgRNA	GATTCCTGGTTTTCACCC
LysTTT-sgRNA	GGGTTCAAGTCCCTGTTC
NoTarget-sgRNA	CGCTTCCGCGGCCCGTTCAA
