# Supplementary material for: Manipulation of the human tRNA pool reveals distinct tRNA sets that act in cellular proliferation or cell cycle arrest
Source: eLife. 2020 Dec 24;9:e58461. doi: 10.7554/eLife.58461 (PMC7781600; doi:10.7554/eLife.58461)
Supplement: Figure 2—source data 1. [file elife-58461-fig2-data1.xlsx]

## Sheet: Sheet1
CRISPR-targted tRNA gene	primer name	primer sequence	Tm for PCR
ArgTCG-1-1	TCG-1-1_F	AGACGGTAACAACCGACG	62.6
	TCG-1-1_R	CTTCGTTCCTGAGGGAGG
ArgTCG-2-1	TCG-2-1_F	TTACAGCTCATAGGGAGGAG	62.6
	TCG-2-1_R	TCTCAAATAACCACGGAGGG
ArgTCG-3-1	TCG-3-1_F	TCTCTAGGAGGTAGCTGC	62.6
	TCG-3-1_R	GGGAAGATTATAGTTGCAGGG
ArgTCG-4-1	TCG-4-1_F	GCAGCAACAACGGAACTG	62.6
	TCG-4-1_R	TTTTCATGCCCGAAAACGAAC
ArgTCG-5-1	TCG-5-1_F	GTGCAGTCTTGTTTTAGAGTG	62.6
	TCG-5-1_R	TTTTGCAGTTGCTAAGCC
ArgTCG-6-1	TCG-6-1_F	CTCTTGGCATTTTGAACAAAGAC	62.6
	TCG-6-1_R	AATATAACCCCTCCACGACC
LeuTAG-1-1	TAG-1-1-F	CAGAACTGTAGCAGGTGCG	62.6
	TAG-1-1-R	ACGGGGACAGTAAGTTTTCG
LeuTAG-2-1	TAG-2-1-F	CTCCTATAACGTGTGTGGTAG	62.6
	TAG-2-1-R	GATCCTTGTTGTGCTAAAACG
LeuTAG-3-1	TAG-3-1-F	AGTGAGACCTTCTGAGGTG	62.6
	TAG-3-1-R	GCATAGGAAGCCCTACGATC
SerCGA-1-1	CGA-1-1-F	ACGCTGTGAGCAGGATTC	66.6
	CGA-1-1-R	GGCGGGCGTGTTGATAG
Ser-GA-2-1	CGA-2-1-F	GTAACCATTTAGAGGGCTGTG	62.6
	CGA-2-1-R	GATGAAAGACTGAGAGTCACAG
SerCGA-3-1	CGA-3-1-F	AACTGATGAAAGTAGCAAATTGG	57.6
	CGA-3-1-R	ACAAAAAGTGTCCTCGGAG
SerCGA-4-1	CGA-4-1-F	GTTCCCGCACGCATTCC	68.8
	CGA-4-1-R	CCCGTCACGAACAGGATTC
ProCGG-1-1	CGG-1-1-F	CGAGAGCGGCTCGTTG	62.6
	CGG-1-1-R	GAATATGTGGGGAATTAGGGGG
ProCGG-1-2	CGG-1-2-F	CGGAAATACACGCACGG	62.6
	CGG-1-2-R	GGTCCCCGATTTTCTAGCTC
ProCGG-1-3	CGG-1-3-F	CTTACAGTCAAGCCTCCTGC	66.6
	CGG-1-3-R	GCAACGTCCGCACGTC
ProCGG-2-1	CGG-2-1-F	ATTTCTAAGTGGCTCGTTGG	62.6
	CGG-2-1-R	TTTGGGTATGACTATTTGGGG
