# Supplementary material for: Manipulation of the human tRNA pool reveals distinct tRNA sets that act in cellular proliferation or cell cycle arrest
Source: eLife journal article supplement (doi:10.7554/elife.58461), 2020-12-24
Supplement: supp [file elife-58461-supp-v1.zip]

Figure1- figure supplement 1

**A**

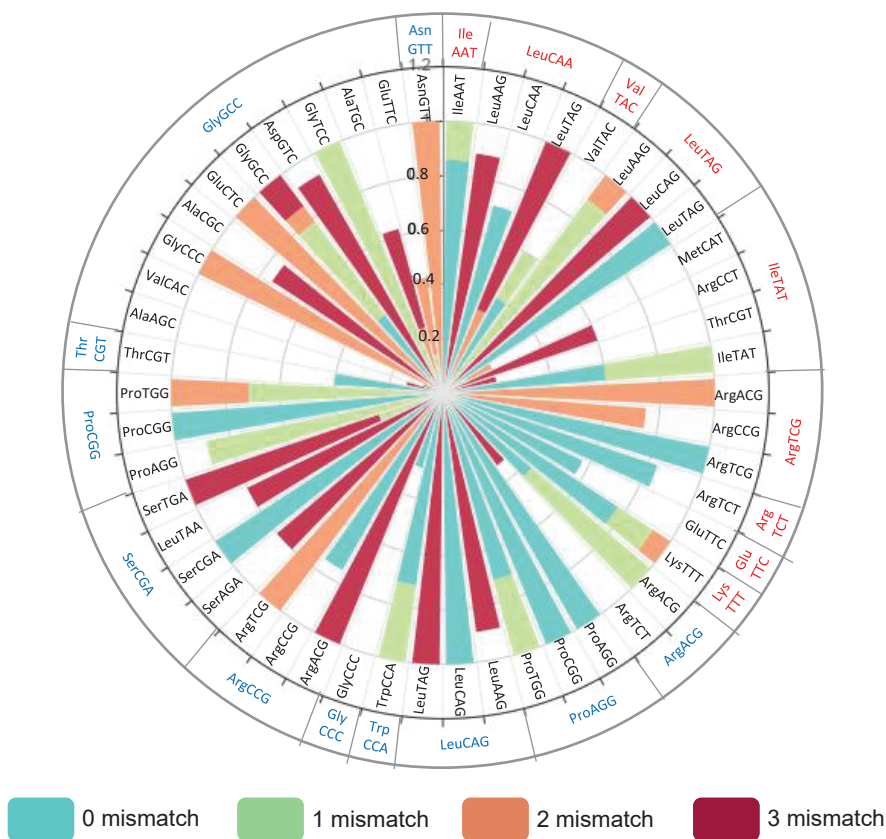

# B

|                       | tRNA    | sgRNA score | Editing site position | Anticodon position | Editing site position from anticodon |
|-----------------------|---------|-------------|-----------------------|--------------------|--------------------------------------|
| Proliferation tRNAs   | Ile-AAT | 97          | 42                    | 35                 | -7                                   |
|                       | Leu-CAA | 56          | 20                    | 35                 | 15                                   |
|                       | Val-TAC | 88          | 41                    | 34                 | -7                                   |
|                       | Leu-TAG | 90          | 33                    | 35                 | 2                                    |
|                       | Ile-TAT | 81          | 65                    | 35                 | -30                                  |
|                       | Arg-TCG | 86          | 32                    | 34                 | 2                                    |
|                       | Arg-TCT | 92          | 25                    | 34                 | 9                                    |
|                       | Glu-TTC | 66          | 38                    | 34                 | -4                                   |
| Differentiation tRNAs | Lys-TTT | 70          | 66                    | 33                 | -33                                  |
|                       | Arg-ACG | 89          | 60                    | 34                 | -26                                  |
|                       | Pro-AGG | 89          | 31                    | 33                 | 2                                    |
|                       | Leu-CAG | 93          | 33                    | 35                 | 2                                    |
|                       | Trp-CCA | 91          | 63                    | 33                 | -30                                  |
|                       | Gly-CCC | 33          | 52                    | 33                 | -19                                  |
|                       | Arg-CCG | 85          | 32                    | 34                 | 2                                    |
|                       | Ser-CGA | 89          | 41                    | 34                 | -7                                   |
|                       | Pro-CGG | 88          | 31                    | 33                 | 2                                    |
|                       | Thr-CGT | 92          | 29                    | 33                 | 4                                    |
| Gly-GCC               | 88      | 64          | 33                    | -31                |                                      |

**C**

| sgRNA   | gene name | num of mismatches | total exons | targeted exon |
|---------|-----------|-------------------|-------------|---------------|
| Arg-ACG | RO60      | 2                 | 8           | 1             |
| Gly-CCC | ZEB1      | 3                 | 9           | 1             |
| Gly-GCC | GLB1L3    | 2                 | 20          | 1             |
| Gly-GCC | RTN4RL1   | 3                 | 2           | 1             |
| Leu-CAA | PLD5      | 2                 | 9           | 1             |
| Thr-CGT | OPALIN    | 3                 | 7           | 1             |
| Pro-AGG | PTPRU     | 3                 | 30          | 3             |
| Gly-GCC | CMTR2     | 2                 | 3           | 3             |
| Leu-CAG | TMEM167B  | 3                 | 3           | 3             |
| Leu-CAA | PCDH1     | 2                 | 5           | 4             |
| Lys-TTT | ARL8A     | 3                 | 6           | 6             |
| Leu-CAA | NRCAM     | 3                 | 31          | 7             |
| Trp-CCA | AGBL2     | 3                 | 19          | 10            |
| Leu-CAA | CYTH2     | 3                 | 12          | 11            |
| Pro-CGG | NPAS3     | 3                 | 12          | 12            |
| Lys-TTT | TMC8      | 3                 | 16          | 16            |
| Lys-TTT | MAPK8IP3  | 3                 | 32          | 21            |
| Arg-CCG | LRRC7     | 3                 | 26          | 26            |
| Leu-TAG | HYDIN     | 3                 | 86          | 64            |
| Arg-ACG | HSPG2     | 3                 | 97          | 92            |
