# Supplementary figures and images for: Manipulation of the human tRNA pool reveals distinct tRNA sets that act in cellular proliferation or cell cycle arrest
Source: eLife journal article supplement (doi:10.7554/elife.58461), 2020-12-24

Figure3- figure supplement 1

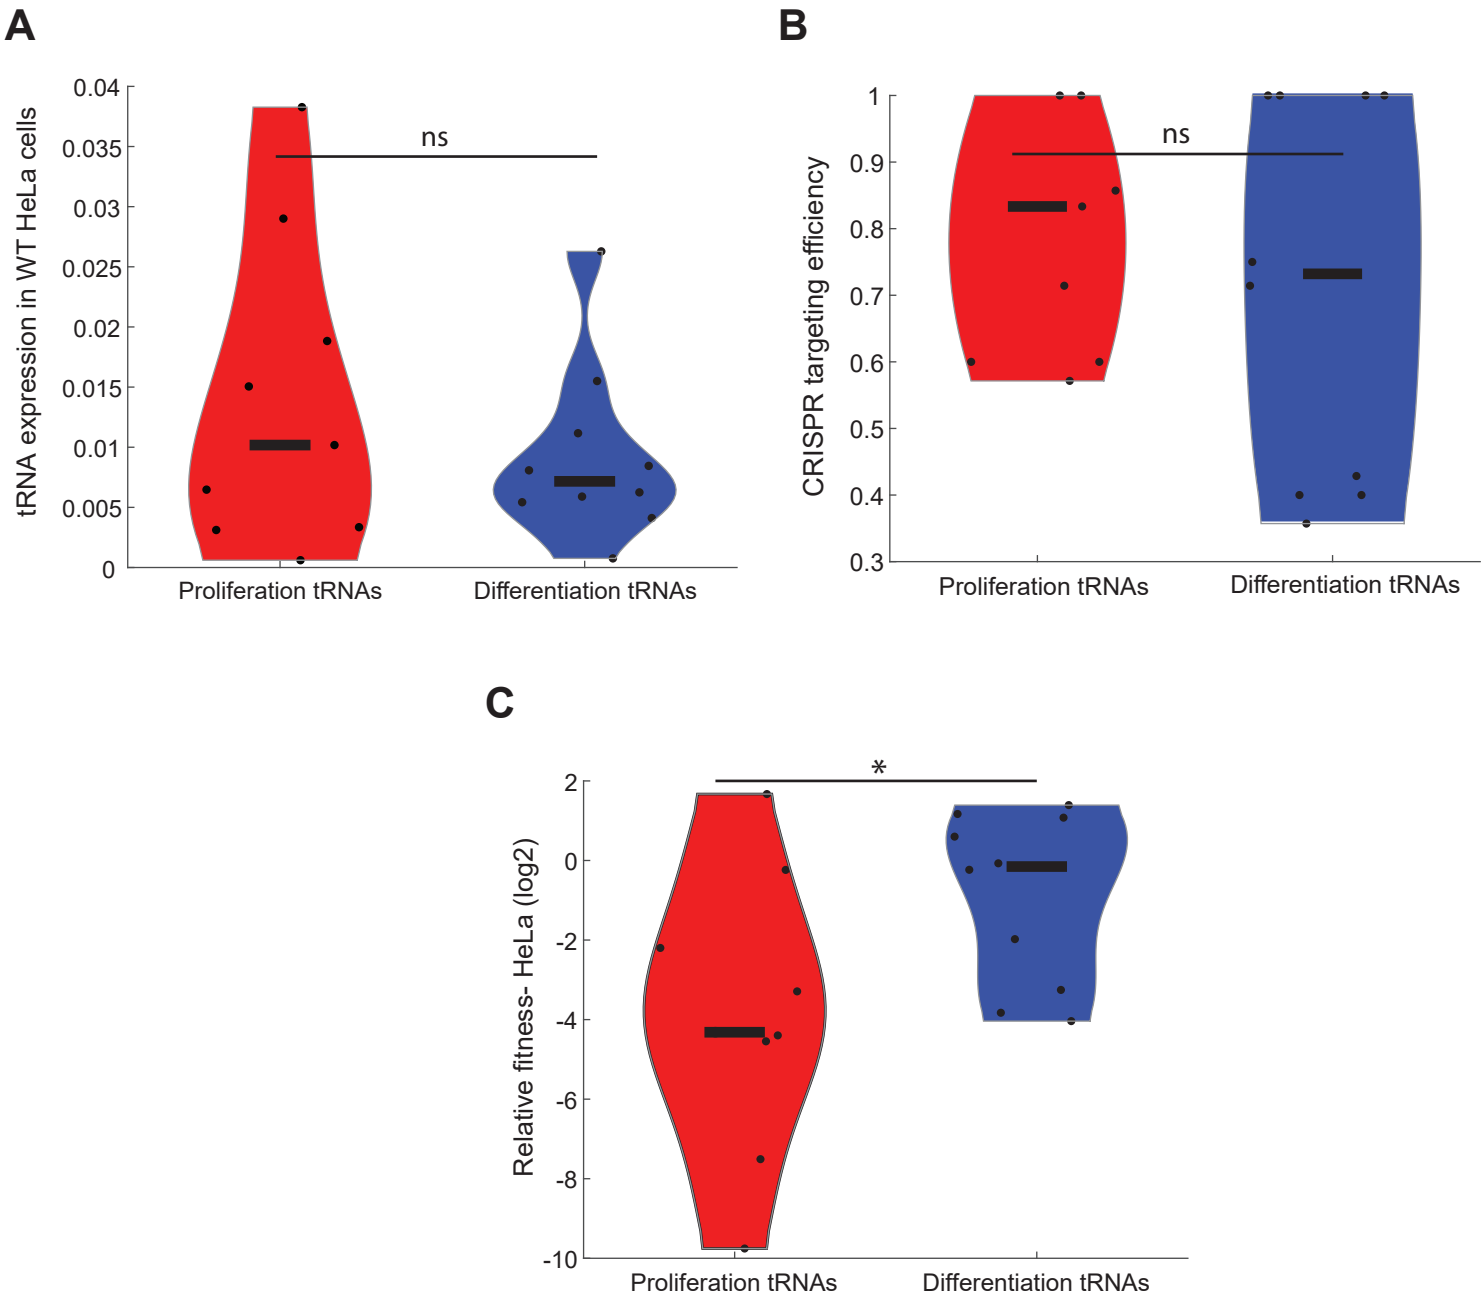

Supplement: supp [file elife-58461-supp-v1.zip]

Figure2- figure supplement 1

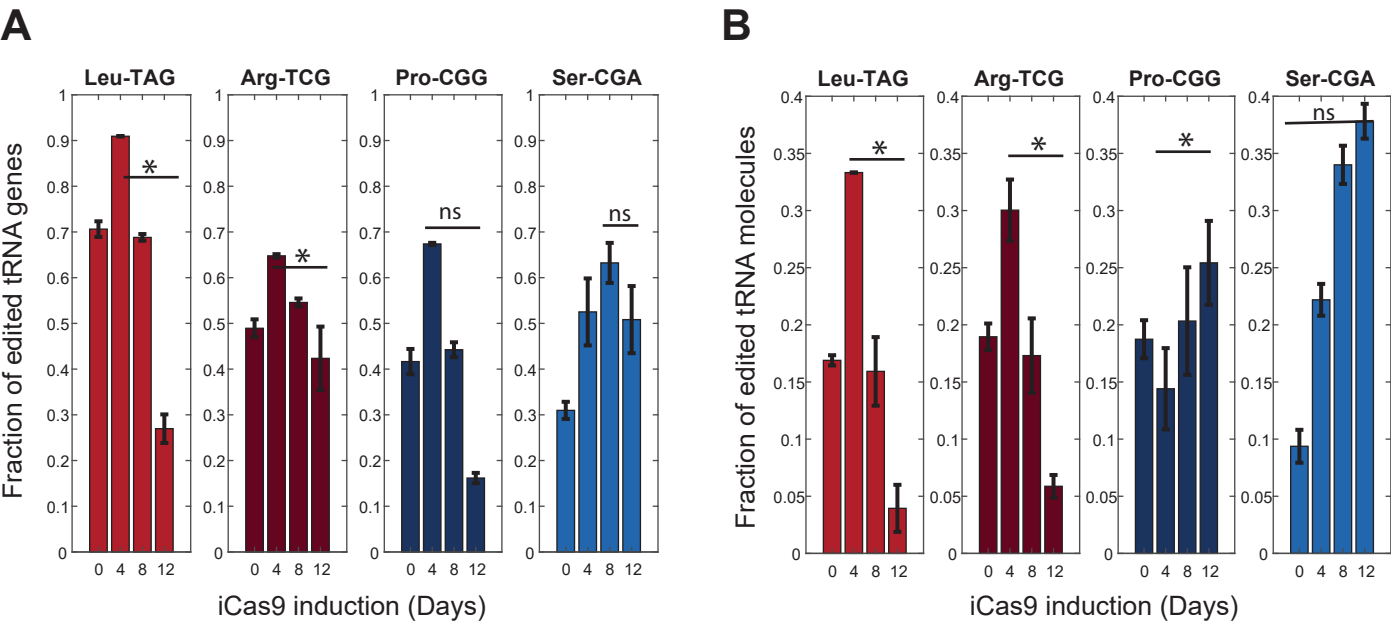

Supplement: supp [file elife-58461-supp-v1.zip]

Figure4- figure supplement 2

C

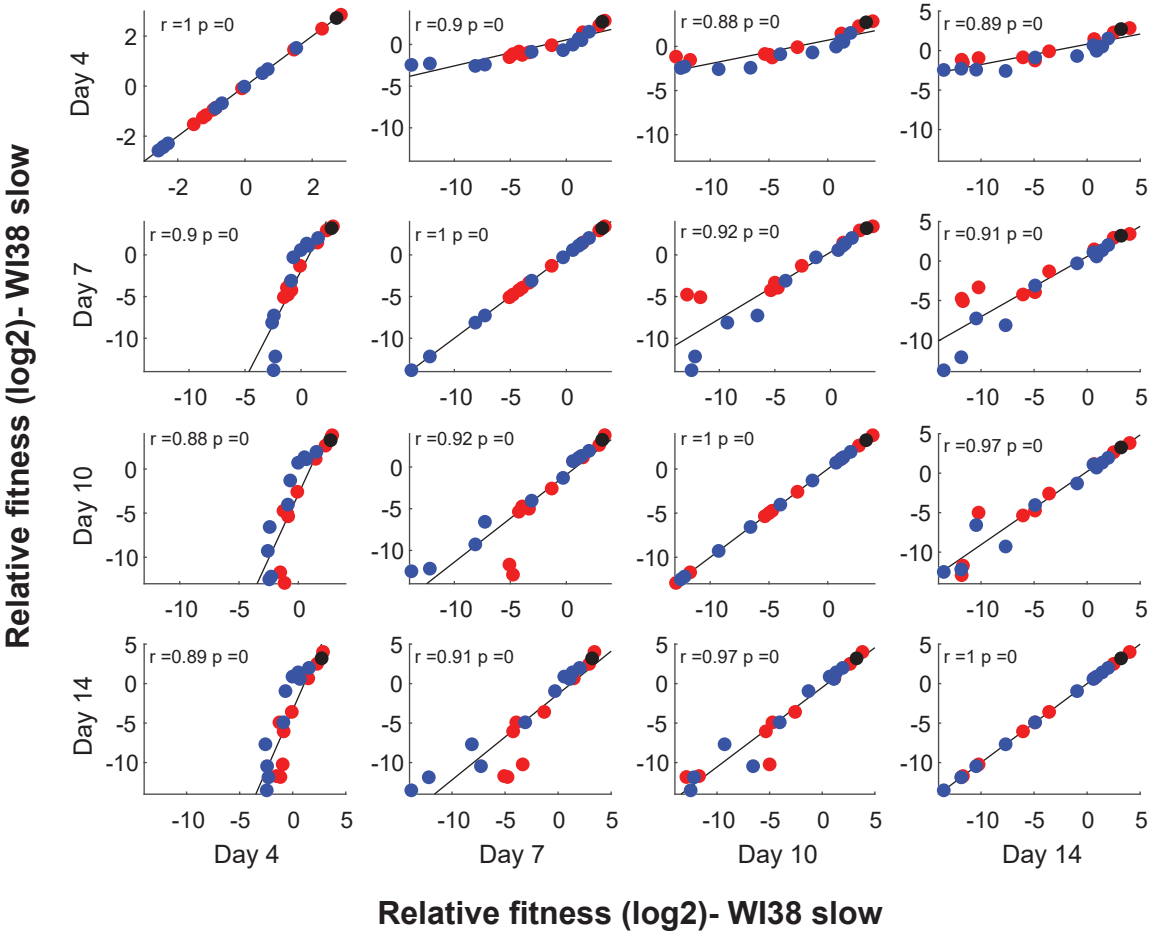

Supplement: supp [file elife-58461-supp-v1.zip]

Figure5- figure supplement 1

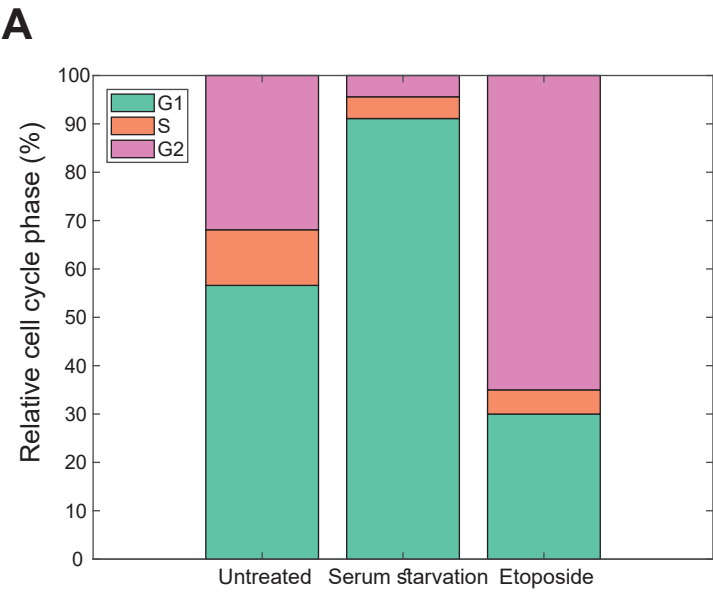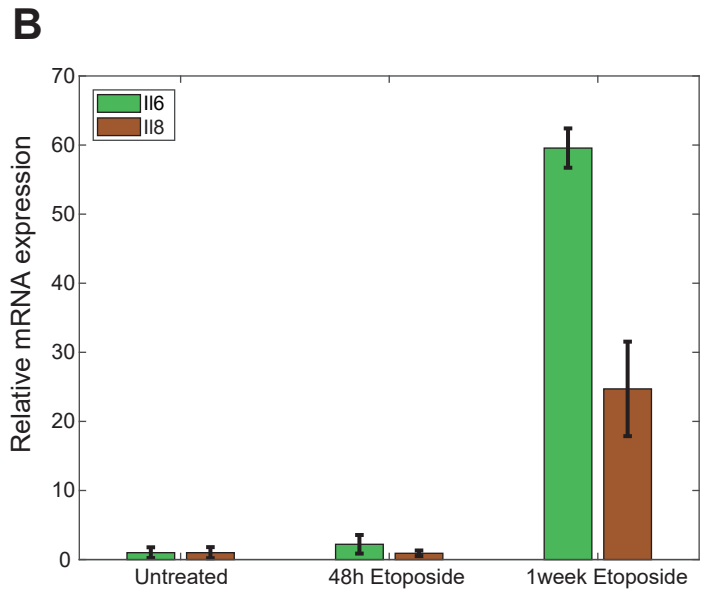

Supplement: supp [file elife-58461-supp-v1.zip]

Figure4- figure supplement 1

A

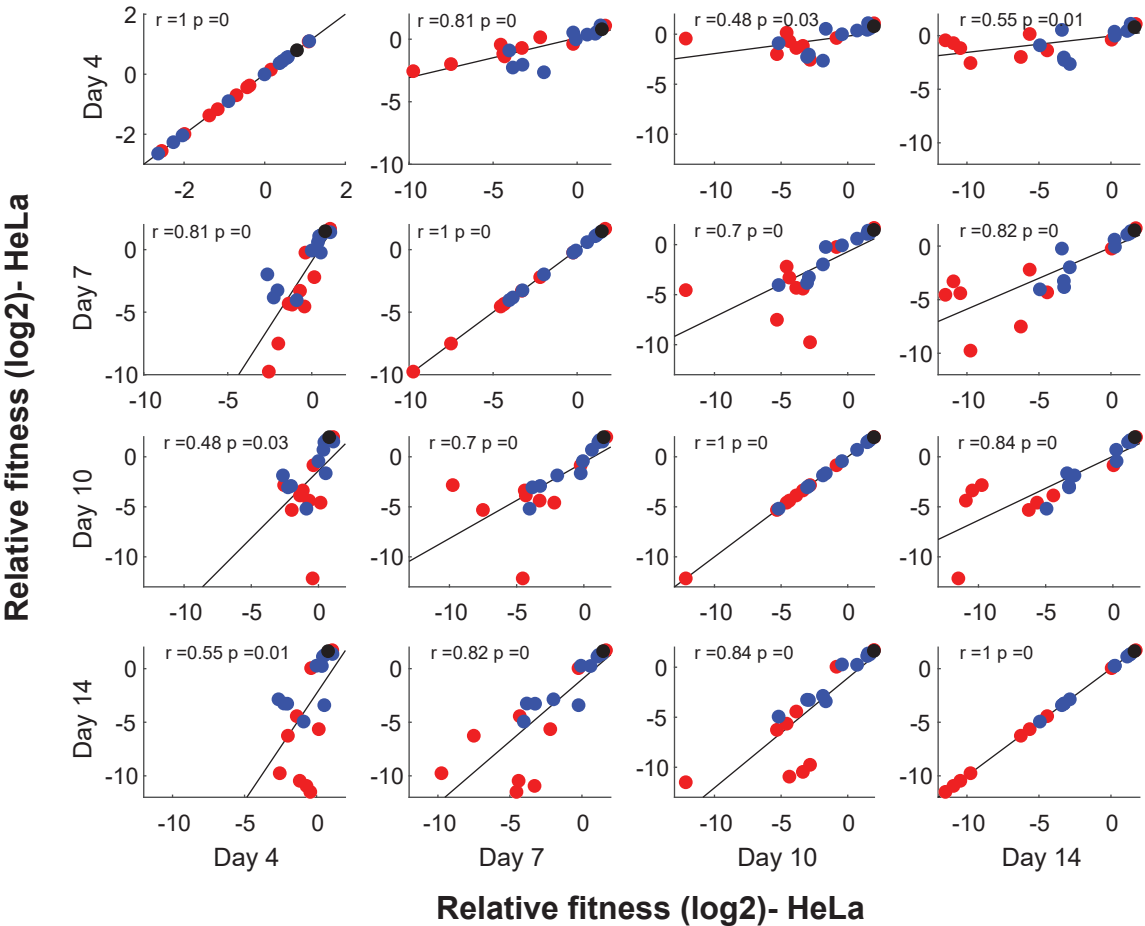

B

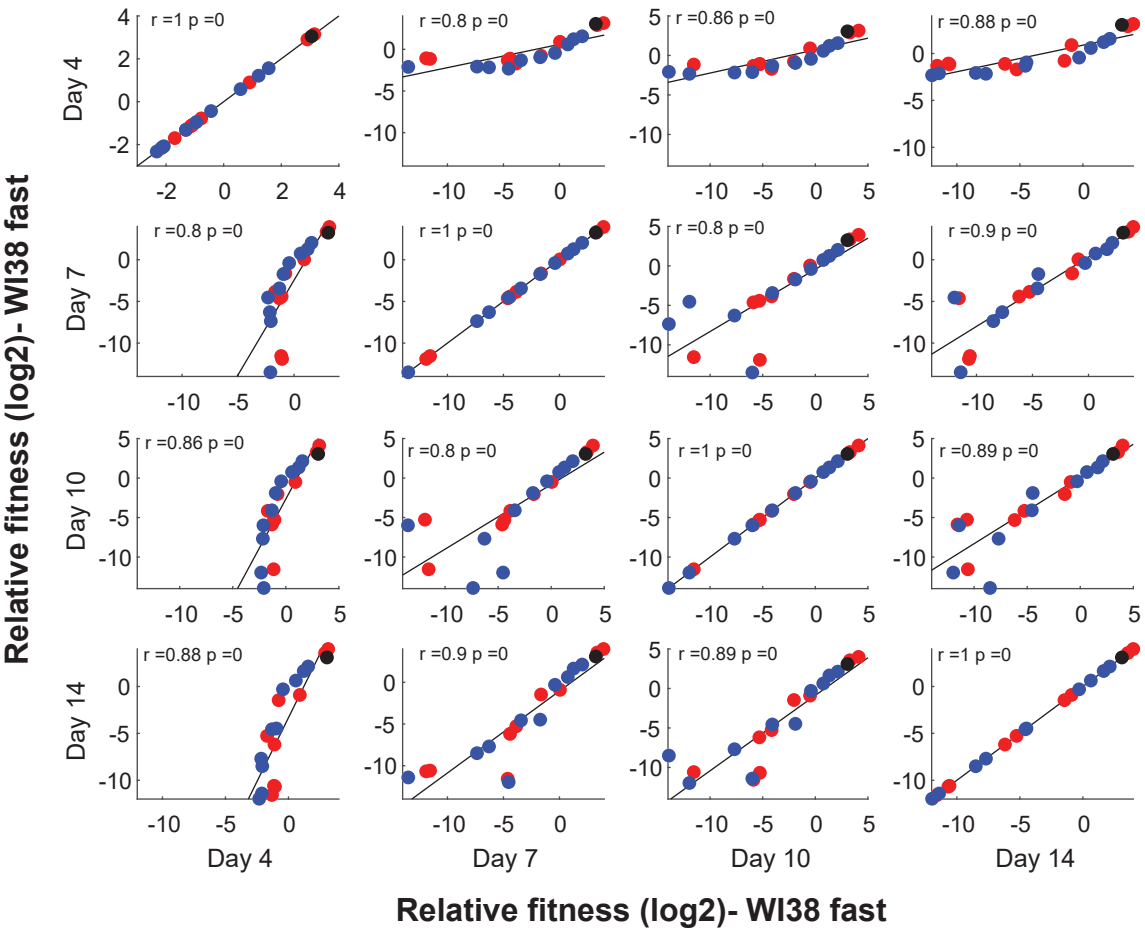

Supplement: supp [file elife-58461-supp-v1.zip]

Figure4- figure supplement 3

**A**

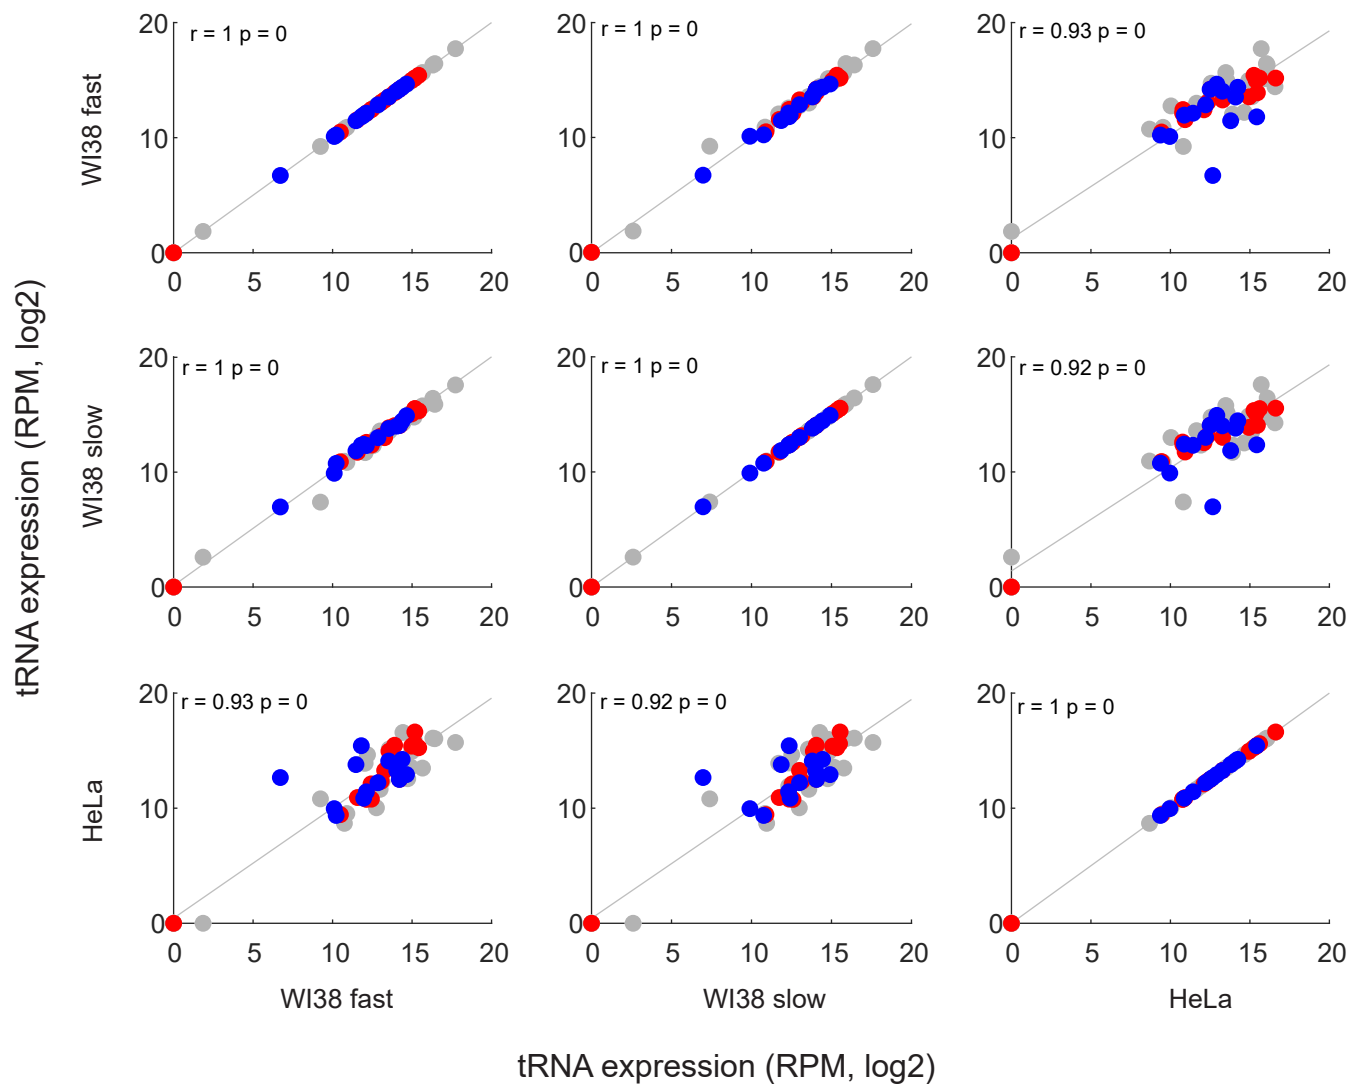

**B**

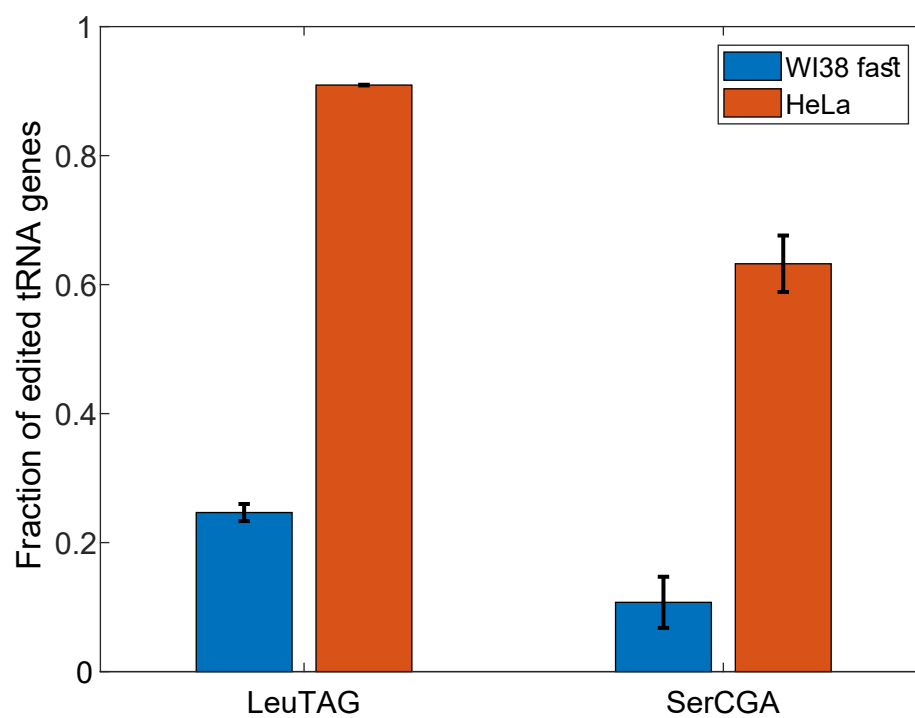

Supplement: supp [file elife-58461-supp-v1.zip]
